# Supplementary material for: High time-resolved measurement of stable carbon isotope composition in water-soluble organic aerosols: method optimization and a case study during winter haze in eastern China
Source: Copernicus journal article supplement (doi:10.5194/acp-19-11071-2019), 2019-09-02
Supplement: Supplementary file 1 [file acp-19-11071-2019-supplement.pdf]

Supplement of Atmos. Chem. Phys., 19, 11071–11087, 2019  
<https://doi.org/10.5194/acp-19-11071-2019-supplement>  
© Author(s) 2019. This work is distributed under  
the Creative Commons Attribution 4.0 License.

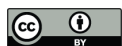

*Supplement of*

## **High time-resolved measurement of stable carbon isotope composition in water-soluble organic aerosols: method optimization and a case study during winter haze in eastern China**

**Wenqi Zhang et al.**

*Correspondence to:* Yan-Lin Zhang ([dryanlinzhang@outlook.com](mailto:dryanlinzhang@outlook.com))

The copyright of individual parts of the supplement might differ from the CC BY 4.0 License.

1 **7 Pages**

2 **1 Table**

3 **5 Figures**

4 **Table S1.** Statistical results of isotope compositions after different heating time.

| Heating time | Carbon content | Average $\delta^{13}\text{C}$ | SD (n=5) | Total SD |
|--------------|----------------|-------------------------------|----------|----------|
| 15           | 0              | -32.01                        |          | 0.53     |
|              | 4              | -28.86                        | 0.24     |          |
|              | 10             | -29.77                        | 0.13     |          |
|              | 30             | -30.00                        | 0.02     |          |
| 30           | 0              | -32.50                        |          | 0.57     |
|              | 4              | -28.92                        | 0.53     |          |
|              | 10             | -29.71                        | 0.09     |          |
|              | 30             | -30.04                        | 0.08     |          |
| 60           | 0              | -31.03                        |          | 0.51     |
|              | 4              | -29.04                        | 0.59     |          |
|              | 10             | -29.71                        | 0.10     |          |
|              | 30             | -29.96                        | 0.05     |          |
| 90           | 0              | -32.47                        |          | 0.71     |
|              | 4              | -28.77                        | 0.22     |          |
|              | 10             | -29.85                        | 0.28     |          |
|              | 30             | -29.39                        | 0.94     |          |
| 120          | 0              | -29.13                        |          | 4.58     |
|              | 4              | -28.59                        | 0.21     |          |
|              | 4              | -26.42                        | 6.46     |          |
|              | 30             | -27.30                        | 5.34     |          |

5

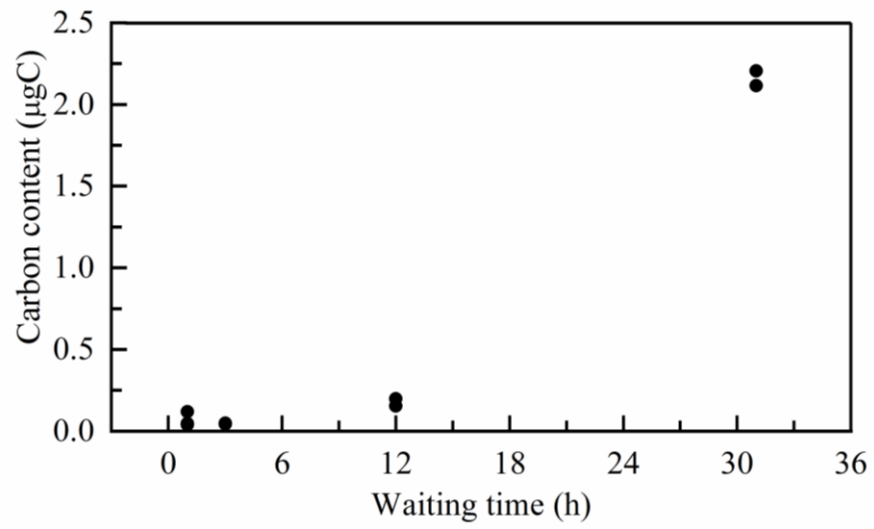

6

7

**Figure S1.** Carbon contents of one ambient aerosol sample replicates tested after different waiting time (duration between the mixture of aerosol extractions with the oxidizing solution and the helium flushing step) without heating.

8

9

10

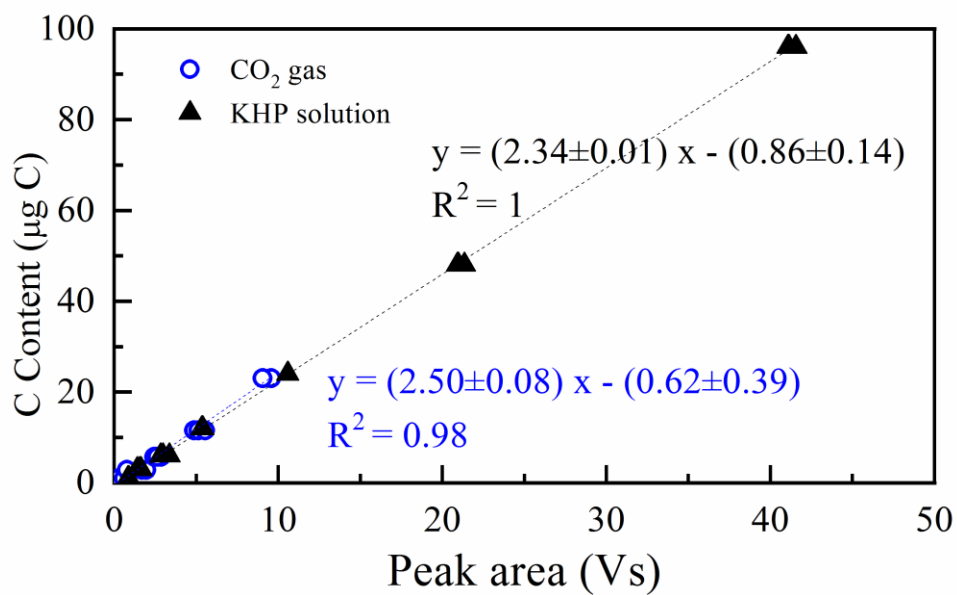

11

12 Figure S2. Standard curve to quantify the unknown samples.

13 (The standard curve is established by the CO<sub>2</sub> gas / the KHP solution and the input carbon content

14 of the certain vials. The blue dotted line is the linear fit of the results of CO<sub>2</sub> gas, and the black

15 dotted line is the linear fit of the results of KHP solution.)

16

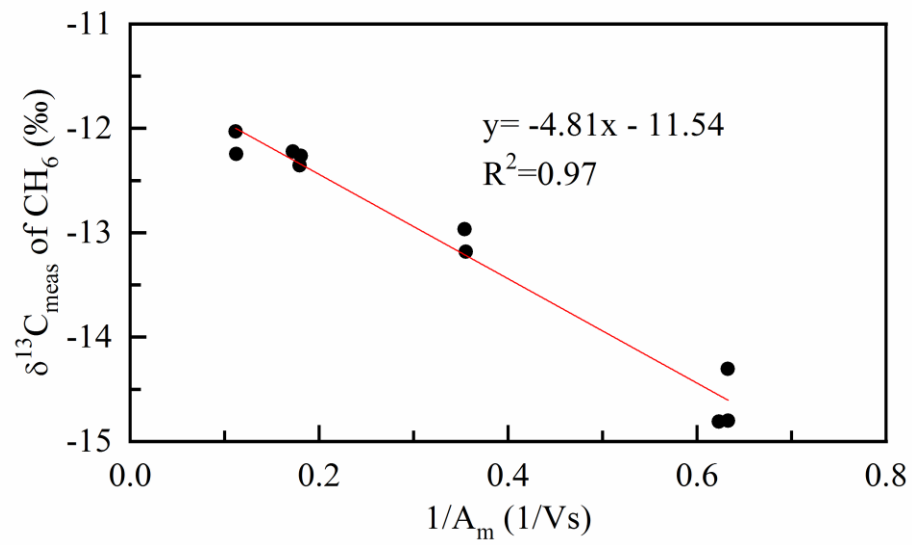

17  
18  
19  
20

**Figure S3.** Relationship between the values of  $1/A_m$  and  $\delta^{13}C$  obtained from the measurement of  $CH_6$ .

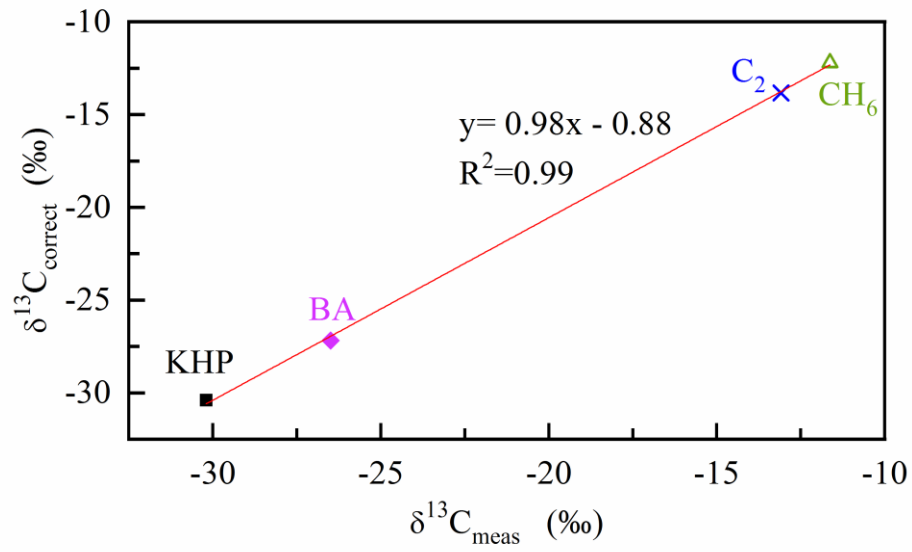

21

22 **Figure S4.** Calibration curve of the isotope composition for the correction of the systematic bias.

23 (The values of y axis are the correct isotope values of the standards measured with EA using  
24 combustion method without pretreatment, and the values of x axis are the measured isotope results

25 of the standards obtained from the wet oxidation method and determined with Gas Bench II.)

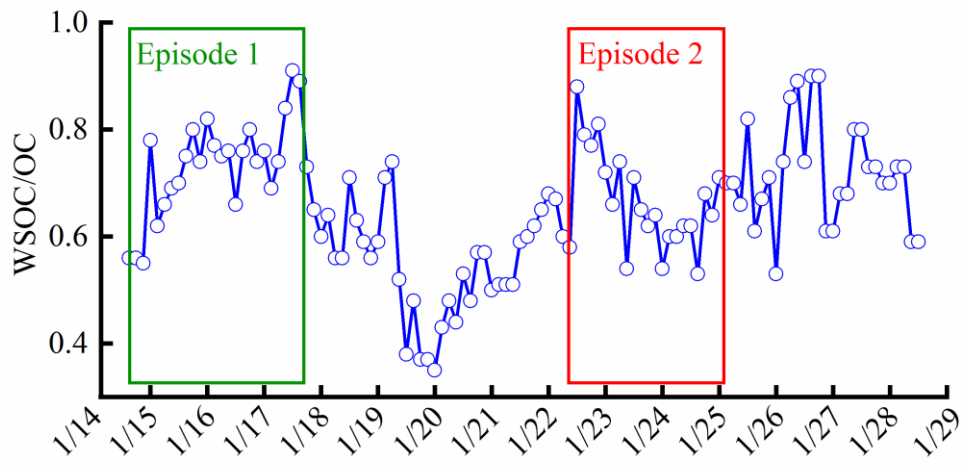

26

27 **Figure S5.** Time series of WSOC/OC.
